# Supplementary material for: Etv2 transcriptionally regulates Yes1 and promotes cell proliferation during embryogenesis
Source: PubMed Central journal article supplement (PMC6611806; doi:10.1038/s41598-019-45841-5), 2019-07-05
Supplement: 41598_2019_45841_MOESM1_ESM.pdf [file 41598_2019_45841_MOESM1_ESM.pdf]

# **Etv2 transcriptionally regulates *Yes1* and promotes cell proliferation during embryogenesis**

Bhairab N. Singh<sup>1</sup>, Wuming Gong<sup>1</sup>, Satyabrata Das<sup>1</sup>, Joshua W. M. Theisen<sup>1,2</sup>, Javier E. Sierra-Pagan<sup>1</sup>, Demetris Yannopoulos<sup>1</sup>, Erik Skie<sup>1</sup>, Pruthvi Shah<sup>1</sup>, Mary G. Garry<sup>1,3,4</sup> and Daniel J. Garry<sup>1,3,4\*</sup>

## Supplemental Information

### **Supplemental Figure 1. Etv2 promotes EdU incorporation in the ES/EB system.**

(a, c) Pseudocolor representation of the FACS plots (related to Figure 3) shown here for improved resolution. (b, d) Quantification of EdU-labelled cells from EBs in the absence (-Dox) and presence (+Dox) of Dox between D2-D3 and D2-D4. Data are presented as mean  $\pm$  SEM (n = 3 replicates; \* p < 0.05).

**Supplemental Figure 2. Etv2 promotes cellular proliferation.** Western blot analysis of proliferating cell nuclear antigen (PCNA) using -Dox and +Dox cell lysates. Our data showed modest enrichment of PCNA in the +Dox condition relative to -Dox condition.

**Supplemental Figure 3. Yes1 is a downstream target of Etv2.** Wider view of evolutionary conservation of the upstream promoter fragment of the *Yes1* gene. Note the high conservation of the Etv2 binding motif across various species. The box region indicates the Etv2 binding motif with the ChIPseq peak.

**Supplemental Figure 4. Yes1 is a downstream target of Etv2.** The EMSA gel figure is the uncropped image used for Figure 5C. The dotted line indicates the cropped EMSA (right side) used to generate Figure 5C.

**Supplemental Table 1.** Etv2 ChIPseq peak analysis from the previously published datasets for the cell cycle genes.

**Supplemental Table 2.** Bulk RNAseq analysis from the previously published datasets for the cell cycle genes following following –Dox and +Dox treatment during ES/EB differentiation.

**Supplemental Table 3.** ATACseq analysis for the cell cycle genes following +Dox treatment during ES/EB differentiation.

**Supplemental Table 4.** List of qPCR taqman probes used in this study.

Figure S1 (Garry)

a

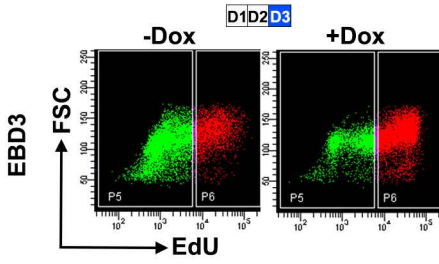

b

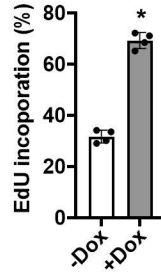

c

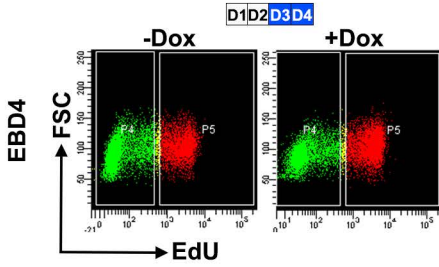

d

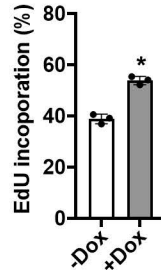

Figure S2 (Garry)

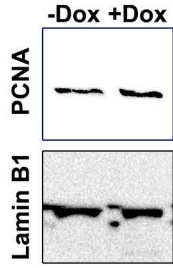

Figure S3 (Garry)

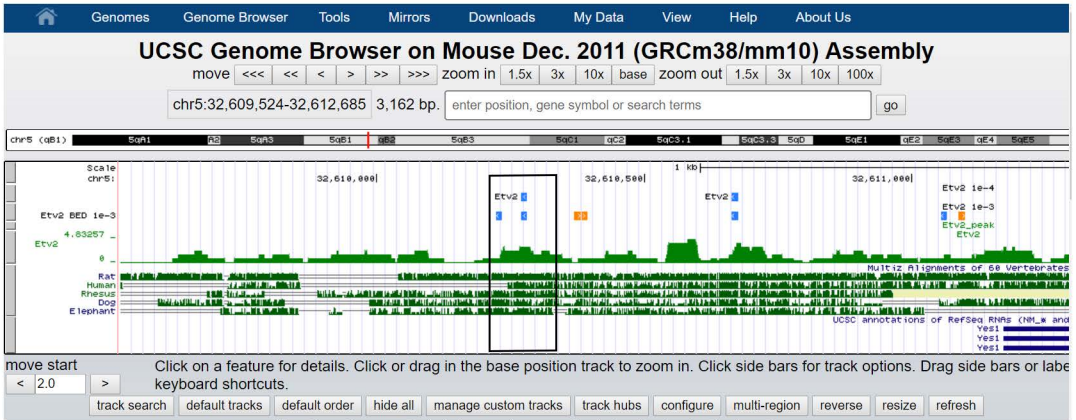

Figure S4 (Garry)

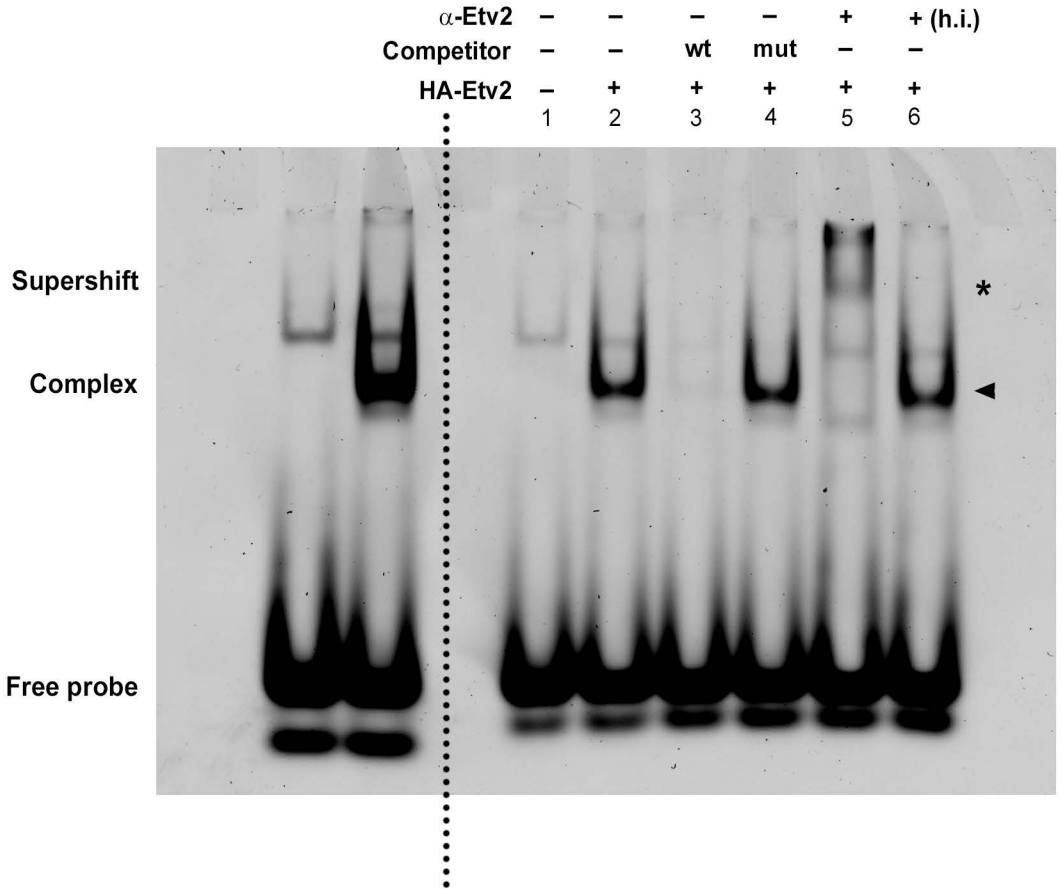

**Supplemental Table 1.** Etv2 ChIPseq peak analysis from the previously published datasets for the cell cycle genes.

| SL | Gene Symbol | Chromosomes | From     | To        | Nearest Ensembl Gene ID | Distance From TSS |
|----|-------------|-------------|----------|-----------|-------------------------|-------------------|
| 1  | Cav2        | chr6        | 17286505 | 17286605  | ENSMUSG00000000058      | -5370             |
| 2  | Cav2        | chr6        | 17286418 | 17286685  | ENSMUSG00000000058      | -5367             |
| 3  | Nudt16      | chr9        | 1.05E+08 | 105136752 | ENSMUSG00000032565      | -5317             |
| 4  | Nudt16      | chr9        | 1.05E+08 | 105136692 | ENSMUSG00000032565      | -5303             |
| 5  | Hmcn1       | chr1        | 1.51E+08 | 150997870 | ENSMUSG00000066842      | -4765             |
| 6  | Hmcn1       | chr1        | 1.51E+08 | 150997887 | ENSMUSG00000066842      | -4712             |
| 7  | Git1        | chr11       | 77497471 | 77497609  | ENSMUSG00000011877      | -3978             |
| 8  | Git1        | chr11       | 77497332 | 77497619  | ENSMUSG00000011877      | -3914             |
| 9  | Fsd1        | chr17       | 55990251 | 55990340  | ENSMUSG00000011589      | -3785             |
| 10 | Yes1        | chr5        | 32608089 | 32608295  | ENSMUSG00000014932      | -2979             |
| 11 | Gdpd5       | chr7        | 99384123 | 99384339  | ENSMUSG00000035314      | -2817             |
| 12 | Zfp36l1     | chr12       | 80115678 | 80115922  | ENSMUSG00000021127      | -2787             |
| 13 | Dgkz        | chr2        | 91968017 | 91968313  | ENSMUSG00000040479      | -2565             |
| 14 | Junb        | chr8        | 84978711 | 84978868  | ENSMUSG00000052837      | -2248             |
| 15 | Junb        | chr8        | 84978628 | 84978907  | ENSMUSG00000052837      | -2226             |
| 16 | Tal1        | chr4        | 1.15E+08 | 115060061 | ENSMUSG00000028717      | -2159             |
| 17 | Junb        | chr8        | 84978538 | 84978639  | ENSMUSG00000052837      | -2047             |
| 18 | Clic1       | chr17       | 35051753 | 35051924  | ENSMUSG00000007041      | -1873             |
| 19 | Flt3l       | chr7        | 45137426 | 45137764  | ENSMUSG000000110206     | -1508             |
| 20 | Zfp36l1     | chr12       | 80114265 | 80114531  | ENSMUSG00000021127      | -1385             |
| 21 | Lrp5        | chr19       | 3687686  | 3687779   | ENSMUSG00000024913      | -1177             |
| 22 | Yes1        | chr5        | 32610148 | 32610512  | ENSMUSG00000014932      | -1169             |
| 23 | Trp53       | chr11       | 69581403 | 69581628  | ENSMUSG00000059552      | -1157             |
| 24 | Trp53       | chr11       | 69581180 | 69581598  | ENSMUSG00000059552      | -1030             |
| 25 | Hhex        | chr19       | 37435636 | 37435963  | ENSMUSG00000024986      | -990              |
| 26 | Uhrf1       | chr17       | 56304143 | 56304309  | ENSMUSG00000001228      | -905              |
| 27 | Parp3       | chr9        | 1.06E+08 | 106477190 | ENSMUSG00000023249      | -899              |
| 28 | Parp3       | chr9        | 1.06E+08 | 106477108 | ENSMUSG00000023249      | -876              |
| 29 | Dusp3       | chr11       | 1.02E+08 | 101984317 | ENSMUSG00000003518      | -674              |
| 30 | Ube2s       | chr7        | 4812859  | 4813040   | ENSMUSG00000060860      | -599              |
| 31 | Psmc13      | chr7        | 1.41E+08 | 140882544 | ENSMUSG00000025487      | -451              |
| 32 | Uvrags      | chr7        | 99141502 | 99141634  | ENSMUSG00000035354      | -427              |
| 33 | Uvrags      | chr7        | 99141412 | 99141586  | ENSMUSG00000035354      | -358              |
| 34 | Chmp3       | chr6        | 71544060 | 71544212  | ENSMUSG00000053119      | -339              |
| 35 | Crlf3       | chr11       | 80081137 | 80081353  | ENSMUSG00000017561      | -307              |



|    |         |       |          |           |                    |      |
|----|---------|-------|----------|-----------|--------------------|------|
| 36 | Rnf167  | chr11 | 70647430 | 70647593  | ENSMUSG00000040746 | -277 |
| 37 | Rnf167  | chr11 | 70647452 | 70647553  | ENSMUSG00000040746 | -268 |
| 38 | Anapc13 | chr9  | 1.03E+08 | 102626595 | ENSMUSG00000035048 | -262 |
| 39 | Bag6    | chr17 | 35135314 | 35135564  | ENSMUSG00000024392 | -261 |
| 40 | Sdccag8 | chr1  | 1.77E+08 | 176814984 | ENSMUSG00000026504 | -232 |
| 41 | Actr3   | chr1  | 1.25E+08 | 125435852 | ENSMUSG00000026341 | -201 |
| 42 | Cdk20   | chr13 | 64432460 | 64432530  | ENSMUSG00000021483 | -181 |
| 43 | Cdk20   | chr13 | 64432336 | 64432600  | ENSMUSG00000021483 | -154 |
| 44 | Figl1   | chr11 | 11809035 | 11809184  | ENSMUSG00000035455 | -151 |
| 45 | Aurka   | chr2  | 1.72E+08 | 172370727 | ENSMUSG00000027496 | -147 |
| 46 | Ppm1g   | chr5  | 31220616 | 31220772  | ENSMUSG00000029147 | -129 |
| 47 | Haus6   | chr4  | 86612062 | 86612273  | ENSMUSG00000038047 | -113 |
| 48 | Chmp5   | chr4  | 40948456 | 40948552  | ENSMUSG00000028419 | -97  |
| 49 | Prpf19  | chr19 | 10895261 | 10895387  | ENSMUSG00000024735 | -93  |
| 50 | Calm3   | chr7  | 16924126 | 16924279  | ENSMUSG00000019370 | -89  |
| 51 | Ccnl1   | chr3  | 65958198 | 65958300  | ENSMUSG00000027829 | -87  |
| 52 | Terb1   | chr8  | 1.05E+08 | 104510007 | ENSMUSG00000052616 | -82  |
| 53 | Ppm1g   | chr5  | 31220494 | 31220746  | ENSMUSG00000029147 | -55  |
| 54 | Champ1  | chr8  | 13869594 | 13869796  | ENSMUSG00000047710 | -54  |
| 55 | Prpf19  | chr19 | 10895113 | 10895456  | ENSMUSG00000024735 | -54  |
| 56 | Syf2    | chr4  | 1.35E+08 | 134931057 | ENSMUSG00000028821 | -52  |
| 57 | Chmp2a  | chr7  | 13034555 | 13034851  | ENSMUSG00000033916 | -52  |
| 58 | Babam1  | chr8  | 71396836 | 71396986  | ENSMUSG00000031820 | -50  |
| 59 | Wasl    | chr6  | 24664967 | 24665146  | ENSMUSG00000029684 | -48  |
| 60 | Washc1  | chr17 | 66111525 | 66111658  | ENSMUSG00000024101 | -46  |
| 61 | Cdk7    | chr13 | 1.01E+08 | 100731079 | ENSMUSG00000069089 | -39  |
| 62 | Appl2   | chr10 | 83648652 | 83648891  | ENSMUSG00000020263 | -34  |
| 63 | Chordc1 | chr9  | 18292033 | 18292278  | ENSMUSG00000001774 | -31  |
| 64 | Mad2l1  | chr6  | 66535329 | 66535511  | ENSMUSG00000029910 | -30  |
| 65 | Gnai3   | chr3  | 1.08E+08 | 108146249 | ENSMUSG00000000001 | -25  |
| 66 | Cdk7    | chr13 | 1.01E+08 | 100731100 | ENSMUSG00000069089 | -25  |
| 67 | Stk4    | chr2  | 1.64E+08 | 164074290 | ENSMUSG00000018209 | -21  |
| 68 | Ccp110  | chr7  | 1.19E+08 | 118712655 | ENSMUSG00000033904 | -21  |
| 69 | Adam17  | chr12 | 21373478 | 21373745  | ENSMUSG00000052593 | -19  |
| 70 | Zbtb17  | chr4  | 1.41E+08 | 141444750 | ENSMUSG00000006215 | -17  |
| 71 | Chtf8   | chr8  | 1.07E+08 | 106893646 | ENSMUSG00000046691 | -17  |
| 72 | E2f4    | chr8  | 1.05E+08 | 105297708 | ENSMUSG00000014859 | -10  |
| 73 | Nup214  | chr2  | 31974335 | 31974548  | ENSMUSG00000001855 | -6   |
| 74 | Fam32a  | chr8  | 72219648 | 72219822  | ENSMUSG00000003039 | -5   |

|     |          |       |          |           |                    |      |
|-----|----------|-------|----------|-----------|--------------------|------|
| 75  | Kif3b    | chr2  | 1.53E+08 | 153291486 | ENSMUSG00000027475 | -4   |
| 76  | Stk4     | chr2  | 1.64E+08 | 164074235 | ENSMUSG00000018209 | -2   |
| 77  | Ccar2    | chr14 | 70153659 | 70153967  | ENSMUSG00000033712 | -2   |
| 78  | Itgb1    | chr8  | 1.29E+08 | 128685708 | ENSMUSG00000025809 | +2   |
| 79  | Ercc3    | chr18 | 32240211 | 32240375  | ENSMUSG00000024382 | +7   |
| 80  | Thoc5    | chr11 | 4895275  | 4895348   | ENSMUSG00000034274 | +9   |
| 81  | Cltc     | chr11 | 86757449 | 86757650  | ENSMUSG00000047126 | +16  |
| 82  | Bbs4     | chr9  | 59353416 | 59353569  | ENSMUSG00000025235 | +16  |
| 83  | Fam32a   | chr8  | 72219608 | 72219817  | ENSMUSG00000003039 | +18  |
| 84  | Thoc5    | chr11 | 4895142  | 4895454   | ENSMUSG00000034274 | +22  |
| 85  | Txnip    | chr3  | 96557837 | 96558033  | ENSMUSG00000038393 | +22  |
| 86  | Itgb1    | chr8  | 1.29E+08 | 128685725 | ENSMUSG00000025809 | +23  |
| 87  | Mad2l1   | chr6  | 66535209 | 66535522  | ENSMUSG00000029910 | +25  |
| 88  | Phactr4  | chr4  | 1.32E+08 | 132422500 | ENSMUSG00000066043 | +26  |
| 89  | Ing4     | chr6  | 1.25E+08 | 125039842 | ENSMUSG00000030330 | +30  |
| 90  | Ercc3    | chr18 | 32240115 | 32240423  | ENSMUSG00000024382 | +31  |
| 91  | Rps6     | chr4  | 86857334 | 86857427  | ENSMUSG00000028495 | +32  |
| 92  | Dapk3    | chr10 | 81182880 | 81183065  | ENSMUSG00000034974 | +33  |
| 93  | Khdrbs1  | chr4  | 1.3E+08  | 129742342 | ENSMUSG00000028790 | +35  |
| 94  | Ddx39b   | chr17 | 35241561 | 35241861  | ENSMUSG00000019432 | +35  |
| 95  | Cltc     | chr11 | 86757447 | 86757603  | ENSMUSG00000047126 | +40  |
| 96  | Pggt1b   | chr18 | 46280771 | 46280841  | ENSMUSG00000024477 | +44  |
| 97  | Gtpbp4   | chr13 | 8995939  | 8996137   | ENSMUSG00000021149 | +45  |
| 98  | Rps6     | chr4  | 86857201 | 86857532  | ENSMUSG00000028495 | +46  |
| 99  | Thap1    | chr8  | 26158026 | 26158162  | ENSMUSG00000037214 | +47  |
| 100 | Thap1    | chr8  | 26158015 | 26158169  | ENSMUSG00000037214 | +49  |
| 101 | Adam17   | chr12 | 21373358 | 21373730  | ENSMUSG00000052593 | +49  |
| 102 | Tbrg1    | chr9  | 37657207 | 37657278  | ENSMUSG00000011114 | +70  |
| 103 | Tbrg1    | chr9  | 37657140 | 37657335  | ENSMUSG00000011114 | +75  |
| 104 | E2f4     | chr8  | 1.05E+08 | 105297762 | ENSMUSG00000014859 | +77  |
| 105 | Rps3     | chr7  | 99483577 | 99483743  | ENSMUSG00000030744 | +78  |
| 106 | Cdk5rap3 | chr11 | 96916337 | 96916486  | ENSMUSG00000018669 | +85  |
| 107 | Ccar2    | chr14 | 70153561 | 70153869  | ENSMUSG00000033712 | +96  |
| 108 | C2cd3    | chr7  | 1E+08    | 100372182 | ENSMUSG00000047248 | +126 |
| 109 | Usp8     | chr2  | 1.27E+08 | 126707335 | ENSMUSG00000027363 | +136 |
| 110 | Rack1    | chr11 | 48799983 | 48800405  | ENSMUSG00000020372 | +138 |
| 111 | C2cd3    | chr7  | 1E+08    | 100372186 | ENSMUSG00000047248 | +159 |
| 112 | Rad51    | chr2  | 1.19E+08 | 119112783 | ENSMUSG00000027323 | +164 |
| 113 | Mnt      | chr11 | 74830679 | 74830820  | ENSMUSG00000000282 | +171 |

|     |          |       |          |           |                    |       |
|-----|----------|-------|----------|-----------|--------------------|-------|
| 114 | Mnt      | chr11 | 74830626 | 74830869  | ENSMUSG00000000282 | +173  |
| 115 | Slbp     | chr5  | 33652092 | 33652211  | ENSMUSG00000004642 | +194  |
| 116 | Bax      | chr7  | 45466460 | 45466706  | ENSMUSG00000003873 | +253  |
| 117 | Fbxw11   | chr11 | 32642364 | 32642539  | ENSMUSG00000020271 | +273  |
| 118 | Casp8ap2 | chr4  | 32615057 | 32615295  | ENSMUSG00000028282 | +302  |
| 119 | Pin1     | chr9  | 20651680 | 20651865  | ENSMUSG00000032171 | +323  |
| 120 | Map4k2   | chr19 | 6340730  | 6340892   | ENSMUSG00000024948 | +324  |
| 121 | Arf1     | chr11 | 59227857 | 59227981  | ENSMUSG00000048076 | +351  |
| 122 | Cdk12    | chr11 | 98202518 | 98202667  | ENSMUSG00000003119 | +467  |
| 123 | Actr2    | chr11 | 20112364 | 20112495  | ENSMUSG00000020152 | +484  |
| 124 | Actr2    | chr11 | 20112304 | 20112536  | ENSMUSG00000020152 | +493  |
| 125 | Grk5     | chr19 | 60889109 | 60889392  | ENSMUSG00000003228 | +499  |
| 126 | Cdt1     | chr8  | 1.23E+08 | 122567484 | ENSMUSG00000006585 | +589  |
| 127 | Rps6ka2  | chr17 | 7169275  | 7169552   | ENSMUSG00000023809 | +702  |
| 128 | Ccdc124  | chr8  | 70873076 | 70873363  | ENSMUSG00000007721 | +716  |
| 129 | Lfng     | chr5  | 1.41E+08 | 140606582 | ENSMUSG00000029570 | +807  |
| 130 | Tal1     | chr4  | 1.15E+08 | 115057020 | ENSMUSG00000028717 | +876  |
| 131 | Vps4a    | chr8  | 1.07E+08 | 107030441 | ENSMUSG00000031913 | +884  |
| 132 | Mcm7     | chr5  | 1.38E+08 | 138171328 | ENSMUSG00000029730 | +1169 |
| 133 | Cdk1     | chr10 | 69351258 | 69351507  | ENSMUSG00000019942 | +1528 |
| 134 | Usp16    | chr16 | 87452665 | 87453014  | ENSMUSG00000025616 | +1864 |
| 135 | Arhgef2  | chr3  | 88603957 | 88604236  | ENSMUSG00000028059 | +1870 |
| 136 | Hmcn1    | chr1  | 1.51E+08 | 150990815 | ENSMUSG00000066842 | +2351 |
| 137 | Rassf2   | chr2  | 1.32E+08 | 132027660 | ENSMUSG00000027339 | +2443 |
| 138 | Mcm3     | chr1  | 20817258 | 20817668  | ENSMUSG00000041859 | +2849 |
| 139 | Pea15a   | chr1  | 1.72E+08 | 172203935 | ENSMUSG00000013698 | +3015 |
| 140 | Ing1     | chr8  | 11555319 | 11555496  | ENSMUSG00000045969 | +3022 |
| 141 | Bmp2     | chr2  | 1.34E+08 | 133548849 | ENSMUSG00000027358 | +3390 |
| 142 | Chd4     | chr6  | 1.25E+08 | 125092646 | ENSMUSG00000063870 | +3439 |
| 143 | Myh9     | chr15 | 77838630 | 77838700  | ENSMUSG00000022443 | +3510 |
| 144 | Gadd45g  | chr13 | 51842827 | 51843159  | ENSMUSG00000021453 | +3685 |
| 145 | Gadd45g  | chr13 | 51842854 | 51843064  | ENSMUSG00000021453 | +3719 |
| 146 | Csnk1a1  | chr18 | 61550442 | 61550621  | ENSMUSG00000024576 | +4743 |
| 147 | Myh9     | chr15 | 77837205 | 77837399  | ENSMUSG00000022443 | +4873 |
| 148 | Tal1     | chr4  | 1.15E+08 | 115052963 | ENSMUSG00000028717 | +4998 |
| 149 | Tal1     | chr4  | 1.15E+08 | 115052970 | ENSMUSG00000028717 | +5034 |

**Supplemental Table 2.** Bulk RNAseq analysis from the previously published datasets for the cell cycle genes with Etv2 ChIPseq peak following –Dox and +Dox treatment during ES/EB differentiation.

| SL | Symbol   | Reference number   | -Dox (6h) | +Dox (6h) | Relative exp. | -Dox (12h) | +Dox (12h) | Relative exp. |
|----|----------|--------------------|-----------|-----------|---------------|------------|------------|---------------|
| 1  | ETV2     | NM_007959.1        | 706       | 10041     | 14.222        | 1440.3     | 8622.4     | 5.9865        |
| 2  | CAV2     | NM_016900.1        | 2         | 26.9      | 13.45         | 9          | 14         | 1.5556        |
| 3  | TAL1     | NM_011527.1        | 481.6     | 3885.9    | 8.0687        | 1020.8     | 5912.1     | 5.7916        |
| 4  | LMO2     | NM_008505.1        | 378       | 2515      | 6.6534        | 544        | 4033       | 7.4136        |
| 5  | RASSF2   | NM_175445.1        | 406.3     | 1466.4    | 3.6092        | 436.8      | 1408.1     | 3.2237        |
| 6  | GADD45G  | NM_011817.1        | 175       | 631       | 3.6057        | 188        | 910        | 4.8404        |
| 7  | GATA2    | NM_008090.1        | 411       | 1100      | 2.6764        | 855        | 3942       | 4.6105        |
| 8  | HMCN1    | NM_00102472<br>0.1 | 138       | 365       | 2.6449        | 257        | 573        | 2.2296        |
| 9  | MAP4K2   | NM_009006.1        | 651.1     | 1660.8    | 2.5508        | 711.2      | 1440       | 2.0247        |
| 10 | HDAC7    | NM_019572.1        | 1281      | 3011.9    | 2.3512        | 1858       | 3733.2     | 2.0093        |
| 11 | YES1     | NM_009535.1        | 1212.9    | 2812.6    | 2.3189        | 1414.4     | 2692.4     | 1.9036        |
| 12 | E2F4     | NM_148952.1        | 11676     | 20133     | 1.7243        | 11452      | 15813      | 1.3808        |
| 13 | PEA15A   | NM_011063.1        | 2115.3    | 3628.1    | 1.7152        | 2989       | 3507       | 1.1733        |
| 14 | APPL2    | NM_145220.1        | 524       | 869       | 1.6584        | 802.8      | 952        | 1.1858        |
| 15 | GRK5     | NM_018869.1        | 249       | 409       | 1.6426        | 267        | 388        | 1.4532        |
| 16 | RPS6KA2  | NM_011299.1        | 2728      | 4453      | 1.6323        | 3226       | 4384       | 1.359         |
| 17 | FIGNL1   | NM_021891.1        | 1251      | 1953      | 1.5612        | 1526       | 1922       | 1.2595        |
| 18 | LFNG     | NM_008494.1        | 188       | 291       | 1.5479        | 508        | 252        | 0.4961        |
| 19 | TXNIP    | NM_023719.1        | 2743      | 4134      | 1.5071        | 3395       | 3297.8     | 0.9714        |
| 20 | ACTR2    | NM_146243.1        | 5214.1    | 7667.9    | 1.4706        | 6042       | 7115       | 1.1776        |
| 21 | HHEX     | NM_008245.1        | 542.3     | 789.3     | 1.4555        | 799        | 1923.4     | 2.4073        |
| 22 | BAX      | NM_007527.1        | 4122      | 5950.3    | 1.4435        | 4565.3     | 6026       | 1.32          |
| 23 | DUSP3    | NM_028207.1        | 691.1     | 972.9     | 1.4078        | 752.8      | 1096.9     | 1.4571        |
| 24 | UVRAG    | NM_178635.1        | 741.8     | 1022.8    | 1.3788        | 729.6      | 1120.9     | 1.5363        |
| 25 | MAD2L1   | NM_019499.1        | 3601      | 4962      | 1.378         | 4367       | 4968       | 1.1376        |
| 26 | FLT3L    | NM_013520.1        | 28        | 38        | 1.3571        | 31         | 25         | 0.8065        |
| 27 | SLBP     | NM_009193.1        | 3712.7    | 5025.3    | 1.3535        | 4402.4     | 4804       | 1.0912        |
| 28 | FBXW11   | NM_134015.1        | 2735.4    | 3684      | 1.3468        | 3294       | 3528.1     | 1.0711        |
| 29 | CASP8AP2 | NM_011997.1        | 2435.2    | 3251      | 1.335         | 3055       | 2757       | 0.9025        |
| 30 | GIT1     | NM_00100414<br>4.1 | 5789      | 7671.4    | 1.3252        | 6831.8     | 7747.5     | 1.134         |
| 31 | ERCC3    | NM_133658.1        | 2080      | 2747      | 1.3207        | 2432       | 2565       | 1.0547        |
| 32 | CRLF3    | NM_018776.1        | 1455      | 1906      | 1.31          | 1631       | 2134       | 1.3084        |

|    |         |                    |        |        |        |        |        |        |
|----|---------|--------------------|--------|--------|--------|--------|--------|--------|
| 33 | UHRF1   | NM_010931.1        | 15912  | 20626  | 1.2962 | 18627  | 18621  | 0.9997 |
| 34 | TRP53   | NM_011640.1        | 13665  | 17679  | 1.2937 | 15049  | 16093  | 1.0693 |
| 35 | THOC5   | NM_172438.1        | 2341   | 3022   | 1.2909 | 2851   | 2916   | 1.0228 |
| 36 | MCM3    | NM_008563.1        | 14779  | 18965  | 1.2832 | 16490  | 17985  | 1.0907 |
| 37 | CDK12   | NM_026952.1        | 5447.7 | 6975.6 | 1.2805 | 6268   | 6339.2 | 1.0114 |
| 38 | ACTR3   | NM_023735.1        | 5679.7 | 7262.7 | 1.2787 | 6946   | 7318.8 | 1.0537 |
| 39 | CDK1    | NM_007659.1        | 4170   | 5322   | 1.2763 | 5251.7 | 5315   | 1.0121 |
| 40 | LRP5    | NM_008513.1        | 6468.1 | 8113.2 | 1.2543 | 7415   | 8157.6 | 1.1001 |
| 41 | MYH9    | NM_022410.1        | 25400  | 31752  | 1.2501 | 28081  | 27458  | 0.9778 |
| 42 | CDT1    | NM_026014.1        | 4459.4 | 5544.2 | 1.2433 | 4898.3 | 4780   | 0.9758 |
| 43 | DGKZ    | NM_138306.1        | 4106.3 | 5064.1 | 1.2333 | 5405.3 | 5704.6 | 1.0554 |
| 44 | THAP1   | NM_199042.1        | 431    | 530    | 1.2297 | 542    | 651.3  | 1.2017 |
| 45 | FSD1    | NM_183178.1        | 647    | 793    | 1.2257 | 647    | 925    | 1.4297 |
| 46 | CHMP5   | NM_029814.1        | 1242   | 1520   | 1.2238 | 1490.8 | 1848   | 1.2396 |
| 47 | ZBTB17  | NM_009541.1        | 1105.7 | 1348   | 1.2191 | 1389   | 1468.8 | 1.0575 |
| 48 | CSNK1A1 | NM_146087.1        | 5946.6 | 7200   | 1.2108 | 6907   | 7307.8 | 1.058  |
| 49 | BBS4    | NM_175325.1        | 387.1  | 467    | 1.2064 | 576    | 409    | 0.7101 |
| 50 | USP8    | NM_019729.1        | 3661   | 4411.8 | 1.2051 | 4370.8 | 4052.5 | 0.9272 |
| 51 | ING1    | NM_011919.1        | 2044   | 2448   | 1.1977 | 2445   | 2320   | 0.9489 |
| 52 | AURKA   | NM_011497.1        | 4648.7 | 5548.2 | 1.1935 | 5244.6 | 5709.6 | 1.0887 |
| 53 | CLTC    | NM_00100390<br>8.1 | 12532  | 14864  | 1.1861 | 14549  | 12820  | 0.8812 |
| 54 | NUP214  | NM_172268.1        | 5529.9 | 6547.5 | 1.184  | 5976   | 5113.9 | 0.8557 |
| 55 | MCM7    | NM_008568.1        | 17672  | 20919  | 1.1838 | 19795  | 19094  | 0.9646 |
| 56 | STK40   | NM_028800.1        | 2507.5 | 2951   | 1.1769 | 3023   | 2418.1 | 0.7999 |
| 57 | RPS6    | NM_009096.1        | 59461  | 69930  | 1.1761 | 67757  | 68213  | 1.0067 |
| 58 | FAM32A  | NM_026455.1        | 3347.2 | 3935.5 | 1.1758 | 3692.2 | 3935.1 | 1.0658 |
| 59 | CTCF    | NM_181322.1        | 6519   | 7639   | 1.1718 | 7627   | 7411   | 0.9717 |
| 60 | CDK7    | NM_009874.1        | 2261.4 | 2648.1 | 1.171  | 2832   | 2572.4 | 0.9083 |
| 61 | CCDC124 | NM_026964.1        | 2627.7 | 3069   | 1.1679 | 2949.1 | 2713   | 0.9199 |
| 62 | CHMP2A  | NM_026885.1        | 2109.4 | 2463   | 1.1676 | 2310   | 2821   | 1.2212 |
| 63 | CHD4    | NM_145979.1        | 29638  | 34592  | 1.1672 | 31696  | 28519  | 0.8998 |
| 64 | GTPBP4  | NM_027000.1        | 5537   | 6460.5 | 1.1668 | 5950.6 | 6087.4 | 1.023  |
| 65 | CHORDC1 | NM_025844.1        | 2972.8 | 3447.3 | 1.1596 | 3378.5 | 3427   | 1.0144 |
| 66 | C2CD3   | NM_00101798<br>5.1 | 2564.6 | 2972   | 1.1589 | 3087.6 | 2704   | 0.8758 |
| 67 | RAD51   | NM_011234.1        | 2391.5 | 2766.8 | 1.1569 | 2835.1 | 2812.6 | 0.9921 |
| 68 | RPS3    | NM_012052.1        | 46395  | 53395  | 1.1509 | 52046  | 54206  | 1.0415 |
| 69 | ARF1    | NM_007476.1        | 12111  | 13897  | 1.1474 | 14242  | 13510  | 0.9486 |
| 70 | CCNL1   | NM_019937.1        | 1717   | 1968.6 | 1.1465 | 2001.9 | 1715.9 | 0.8571 |

|     |          |             |        |        |        |        |        |        |
|-----|----------|-------------|--------|--------|--------|--------|--------|--------|
| 71  | PPM1G    | NM_008014.1 | 10846  | 12414  | 1.1446 | 12042  | 11565  | 0.9604 |
| 72  | MNT      | NM_010813.1 | 2209.4 | 2526.3 | 1.1434 | 2524   | 2271   | 0.8998 |
| 73  | WASL     | NM_028459.1 | 3325.7 | 3742   | 1.1252 | 3874.8 | 3611.4 | 0.932  |
| 74  | ARHGEF2  | NM_008487.1 | 3923.5 | 4408.4 | 1.1236 | 4758.6 | 4310.9 | 0.9059 |
| 75  | CALM3    | NM_007590.1 | 13158  | 14755  | 1.1214 | 14786  | 16534  | 1.1182 |
| 76  | UBE2S    | NM_133777.1 | 14353  | 16068  | 1.1195 | 15329  | 16430  | 1.0718 |
| 77  | ADAM17   | NM_009615.1 | 1838.5 | 2044.7 | 1.1122 | 2282.4 | 2266.1 | 0.9929 |
| 78  | PRPF19   | NM_134129.1 | 12460  | 13792  | 1.1069 | 14295  | 12990  | 0.9088 |
| 79  | SDCCAG8  | NM_029756.1 | 151    | 166.9  | 1.1053 | 237.5  | 168    | 0.7074 |
| 80  | CDK5RAP3 | NM_030248.1 | 1840.4 | 2008.6 | 1.0914 | 2186.8 | 2114   | 0.9667 |
| 81  | KIF3B    | NM_008444.1 | 1089   | 1186   | 1.0891 | 1437.6 | 1302   | 0.9057 |
| 82  | PSMD13   | NM_011875.1 | 3355.4 | 3628.3 | 1.0813 | 3666   | 3610   | 0.9847 |
| 83  | RNF167   | NM_027445.1 | 1918.4 | 2066.6 | 1.0773 | 2270.8 | 2043.6 | 0.8999 |
| 84  | TBRG1    | NM_025289.1 | 3995   | 4255   | 1.0651 | 4508   | 3942   | 0.8744 |
| 85  | ANAPC13  | NM_181394.1 | 1218   | 1291   | 1.0599 | 1346   | 1369   | 1.0171 |
| 86  | SYF2     | NM_026780.1 | 1437   | 1519   | 1.0571 | 1718   | 1714.1 | 0.9977 |
| 87  | DDX39B   | NM_019693.1 | 14721  | 15511  | 1.0536 | 18128  | 14845  | 0.8189 |
| 88  | CLIC1    | NM_033444.1 | 3897.5 | 4083.8 | 1.0478 | 4864   | 5688.2 | 1.1694 |
| 89  | ING4     | NM_133345.1 | 716.8  | 746    | 1.0407 | 1039   | 891    | 0.8576 |
| 90  | ZFP36L1  | NM_007564.1 | 3435.8 | 3557   | 1.0353 | 4446.8 | 3736   | 0.8402 |
| 91  | NUDT16   | NM_029385.1 | 65     | 67     | 1.0308 | 80     | 99     | 1.2375 |
| 92  | DAPK3    | NM_007828.1 | 1712   | 1750.6 | 1.0225 | 1958   | 1729   | 0.883  |
| 93  | JUNB     | NM_008416.1 | 918    | 926    | 1.0087 | 1322   | 937    | 0.7088 |
| 94  | ITGB1    | NM_010578.1 | 7509.8 | 7520.2 | 1.0014 | 9651.8 | 7885.2 | 0.817  |
| 95  | CHTF8    | NM_145412.1 | 6984.1 | 6961   | 0.9967 | 8664.1 | 6893   | 0.7956 |
| 96  | GDPD5    | NM_201352.1 | 301    | 299    | 0.9934 | 402    | 511.9  | 1.2734 |
| 97  | DNMT3B   | NM_010068.1 | 55289  | 54700  | 0.9894 | 55988  | 48226  | 0.8614 |
| 98  | GNAI3    | NM_010306.1 | 4729   | 4620   | 0.977  | 5752   | 4396   | 0.7643 |
| 99  | BMP2     | NM_007553.1 | 307    | 294    | 0.9577 | 574    | 418    | 0.7282 |
| 100 | VPS4A    | NM_126165.1 | 938    | 847    | 0.903  | 1240   | 1020   | 0.8226 |
| 101 | KHDRBS1  | NM_011317.1 | 11060  | 9957.8 | 0.9003 | 12896  | 10603  | 0.8222 |
| 102 | CDK20    | NM_053180.1 | 223    | 183    | 0.8206 | 231    | 247    | 1.0693 |
| 103 | HAND2    | NM_010402.1 | 276    | 85     | 0.308  | 567    | 202    | 0.3563 |

**Supplemental Table 3.** ATACseq peak analysis for the cell cycle genes following +Dox treatment during ES/EB differentiation.

| Gene symbol | Nearest Ensembl Id   | log2FoldChange (ATACseq EBD3) | p-value     |
|-------------|----------------------|-------------------------------|-------------|
| Mcm3        | ENSMUSG000000041859  | 1.808834932                   | 0.005517199 |
| Hmcn1       | ENSMUSG000000066842  | 1.502810045                   | 0.021793135 |
| Dgkz        | ENSMUSG000000040479  | 1.095718937                   | 0.057115498 |
| Etv2        | ENSMUSG000000006311  | 1.116360697                   | 0.058115765 |
| Tal1        | ENSMUSG000000028717  | 1.208087781                   | 0.066762917 |
| Cav2        | ENSMUSG000000000058  | 1.17175853                    | 0.093669816 |
| Pea15a      | ENSMUSG000000013698  | 0.748359211                   | 0.094698492 |
| Vps4a       | ENSMUSG000000031913  | 0.999169722                   | 0.159667998 |
| Rassf2      | ENSMUSG000000027339  | 0.937929985                   | 0.197220196 |
| Hhex        | ENSMUSG000000024986  | 0.924976829                   | 0.205138959 |
| Yes1        | ENSMUSG000000014932  | 0.748517436                   | 0.211689506 |
| Myh9        | ENSMUSG000000022443  | 0.746362933                   | 0.276617861 |
| Thoc5       | ENSMUSG000000034274  | 0.45493221                    | 0.288905019 |
| Zbtb17      | ENSMUSG000000006215  | 0.781508528                   | 0.29121029  |
| Hdac7       | ENSMUSG000000022475  | 0.506977996                   | 0.319535055 |
| Gdpd5       | ENSMUSG000000035314  | 0.423798435                   | 0.342190459 |
| Tal1        | ENSMUSG000000028717  | 0.25461797                    | 0.379128598 |
| Fsd1        | ENSMUSG000000011589  | 0.532667579                   | 0.400058492 |
| Tal1        | ENSMUSG000000028717  | 0.236571314                   | 0.410538455 |
| Zfp36l1     | ENSMUSG000000021127  | 0.604935017                   | 0.414476101 |
| Thoc5       | ENSMUSG000000034274  | 0.370404495                   | 0.423353136 |
| Psmc13      | ENSMUSG000000025487  | 0.265770688                   | 0.446178577 |
| Flt3l       | ENSMUSG0000000110206 | 0.432264445                   | 0.46670459  |
| Bmp2        | ENSMUSG000000027358  | 0.411235783                   | 0.553348073 |
| Chd4        | ENSMUSG000000063870  | 0.428212692                   | 0.568262243 |
| Lfng        | ENSMUSG000000029570  | 0.245551559                   | 0.62261022  |
| Bbs4        | ENSMUSG000000025235  | 0.146904641                   | 0.640955185 |
| Cdk1        | ENSMUSG000000019942  | 0.284800077                   | 0.643550931 |
| Khdrbs1     | ENSMUSG000000028790  | 0.207426672                   | 0.668979825 |
| Fam32a      | ENSMUSG000000003039  | 0.148043237                   | 0.672163069 |
| Lmo2        | ENSMUSG000000032698  | 0.207697932                   | 0.713270951 |
| Cdt1        | ENSMUSG000000006585  | 0.10008743                    | 0.829385623 |
| Gadd45g     | ENSMUSG000000021453  | 0.101362259                   | 0.8313568   |
| Prpf19      | ENSMUSG000000024735  | 0.060779844                   | 0.840012217 |
| Tal1        | ENSMUSG000000028717  | 0.108424283                   | 0.851400702 |
| Dusp3       | ENSMUSG000000003518  | 0.133516443                   | 0.858212043 |
| Trp53       | ENSMUSG000000059552  | 0.057305947                   | 0.860277928 |
| Prpf19      | ENSMUSG000000024735  | 0.049440533                   | 0.869339807 |
| Lrp5        | ENSMUSG000000024913  | 0.094789231                   | 0.871833206 |

|         |                    |             |             |
|---------|--------------------|-------------|-------------|
| Rps6ka2 | ENSMUSG00000023809 | 0.072750988 | 0.890207362 |
| Gata2   | ENSMUSG00000015053 | 0.088197621 | 0.891491288 |
| Ctcf1   | ENSMUSG00000070495 | 0.102317124 | 0.891742393 |
| Gata2   | ENSMUSG00000015053 | 0.064464943 | 0.919929629 |
| Rnf167  | ENSMUSG00000040746 | 0.04366622  | 0.921645502 |
| Usp8    | ENSMUSG00000027363 | 0.027595411 | 0.933608237 |
| Psm13   | ENSMUSG00000025487 | 0.023589182 | 0.936875917 |
| Ing4    | ENSMUSG00000030330 | 0.02363832  | 0.945430275 |
| Txnip   | ENSMUSG00000038393 | 0.014928685 | 0.966993068 |



**Supplemental Table 4.** List of qPCR probes used in this study.

| <b>SL</b> | <b>Probe Name</b> | <b>Assay ID</b> |
|-----------|-------------------|-----------------|
| 1         | Cdkn2a            | Mm00494449_m1   |
| 2         | Ccnd2             | Mm00438070_m1   |
| 3         | Ccna2             | Mm00438063_m1   |
| 4         | Ccne1             | Mm01266311_m1   |
| 5         | Cdkn1b            | Mm00438168_m1   |
| 6         | Yes1              | Mm00501523_m1   |
| 7         | Cdk7              | Mm01282896_m1   |
